# Supplementary material for: Antisense RNAs during early vertebrate development are divided in groups with distinct features
Source: Genome Res. 2021 Jun;31(6):995–1010. doi: 10.1101/gr.262964.120 (PMC8168585; doi:10.1101/gr.262964.120)
Supplement: Supplemental Material [file supp_gr.262964.120_Supplemental_Table_S2.xlsx]

## Sheet: Sheet9
Table S2: Chi-square calculation corresponding to UpSet plots in Figure 2
The table corresponds to the UpSet plots shown in Figure 2C. The columns show percentage of NATs from the three groups that are stable in consecutive stages of development. For each combination of stages, a chi-squre p-value is provided.
Stages	Group-1	Group-2	Group-3	Chi-square p-value
1000Cell 2-4Cell Dome	12.82	1.15	3.13	0.00192006
2-4Cell Dome	5.13	0	0	0.0343405
Bud	0	2.3	0	0.0808829
1000Cell	0	11.49	15.63	0.0894024
Bud Dome Shield	0	1.15	0	0.137516
Bud Shield	0	1.15	0	0.137516
120hpf Shield	0	0	0	0.150977
24hpf Dome	0	0	0	0.150977
120hpf 24hpf 48hpf	10.26	5.75	3.13	0.156196
120hpf	2.56	13.79	3.13	0.161581
24hpf 48hpf	5.13	1.15	0	0.180722
1000Cell 2-4Cell 24hpf Bud Dome Shield	2.56	0	3.13	0.185312
1000Cell 2-4Cell Shield	2.56	0	3.13	0.185312
24hpf	2.56	0	0	0.185312
24hpf Bud	2.56	0	0	0.185312
2-4Cell Dome Shield	2.56	0	0	0.275775
1000Cell Dome	2.56	1.15	3.13	0.313663
Dome Shield	0	5.75	0	0.331266
120hpf 2-4Cell 24hpf 48hpf Bud	0	1.15	3.13	0.52725
120hpf 24hpf	0	1.15	3.13	0.52725
24hpf 48hpf Shield	0	1.15	0	0.52725
48hpf Bud	0	1.15	0	0.52725
Shield	2.56	5.75	0	0.546395
1000Cell 120hpf 2-4Cell	2.56	1.15	9.38	0.584134
1000Cell 2-4Cell Bud Dome	2.56	1.15	3.13	0.584134
120hpf 2-4Cell	2.56	1.15	3.13	0.584134
1000Cell 2-4Cell	5.13	8.05	6.25	0.62371
1000Cell 2-4Cell Dome Shield	7.69	5.75	3.13	0.655557
1000Cell 120hpf 2-4Cell 24hpf 48hpf Bud Dome Shield	2.56	2.3	9.38	0.660593
2-4Cell	2.56	2.3	0	0.660593
48hpf	2.56	2.3	0	0.660593
1000Cell 120hpf 2-4Cell 24hpf Bud Dome Shield	0	1.15	6.25	0.677372
1000Cell 120hpf 24hpf	0	1.15	6.25	0.677372
1000Cell 120hpf 24hpf 48hpf Bud Dome Shield	0	1.15	6.25	0.677372
1000Cell 24hpf 48hpf Bud Dome Shield	0	1.15	3.13	0.677372
120hpf 24hpf 48hpf Bud	0	1.15	0	0.677372
120hpf 24hpf 48hpf Bud Shield	0	1.15	0	0.677372
120hpf 24hpf 48hpf Shield	0	1.15	0	0.677372
120hpf 24hpf Bud Dome Shield	0	1.15	0	0.677372
120hpf 48hpf Bud	0	1.15	0	0.677372
24hpf 48hpf Bud Dome	0	1.15	0	0.677372
1000Cell 2-4Cell 24hpf 48hpf Dome		1.15	3.13	0.677372
120hpf 24hpf 48hpf Bud Dome Shield	2.56	1.15	0	0.724729
120hpf 48hpf	2.56	2.3	0	0.966939
Dome	2.56	3.45	0	0.983704
				0.0894024
				0.584134
				0.660593
				0.677372
				0.677372
				0.677372
				0.62371
				0.677372
				0.185312
				0.584134
				0.00192006
				0.655557
				0.185312
				0.677372
				0.313663
				0.161581
				0.584134
				0.52725
				0.52725
				0.156196
				0.677372
				0.724729
				0.677372
				0.677372
				0.677372
				0.966939
				0.677372
				0.150977
				0.660593
				0.0343405
				0.275775
				0.185312
				0.180722
				0.677372
				0.52725
				0.185312
				0.150977
				0.660593
				0.52725
				0.0808829
				0.137516
				0.137516
				0.983704
				0.331266
				0.546395
				0.0894024
				0.584134
				0.660593
				0.677372
				0.677372
				0.677372
				0.62371
				0.677372
				0.185312
				0.584134
				0.00192006
				0.655557
				0.185312
				0.677372
				0.313663
				0.161581
				0.584134
				0.52725
				0.52725
				0.156196
				0.677372
				0.724729
				0.677372
				0.677372
				0.677372
				0.966939
				0.677372
				0.150977
				0.660593
				0.0343405
				0.275775
				0.185312
				0.180722
				0.677372
				0.52725
				0.185312
				0.150977
				0.660593
				0.52725
				0.0808829
				0.137516
				0.137516
				0.983704
				0.331266
				0.546395
				0.0894024
				0.584134
				0.660593
				0.677372
				0.677372
				0.677372
				0.62371
				0.677372
				0.185312
				0.584134
				0.00192006
				0.655557
				0.185312
				0.677372
				0.313663
				0.161581
				0.584134
				0.52725
				0.52725
				0.156196
				0.677372
				0.724729
				0.677372
				0.677372
				0.677372
				0.966939
				0.677372
				0.150977
				0.660593
				0.0343405
				0.275775
				0.185312
				0.180722
				0.677372
				0.52725
				0.185312
				0.150977
				0.660593
				0.52725
				0.0808829
				0.137516
				0.137516
				0.983704
				0.331266
				0.546395
				0.0894024
				0.584134
				0.660593
				0.677372
				0.677372
				0.677372
				0.62371
				0.677372
				0.185312
				0.584134
				0.00192006
				0.655557
				0.185312
				0.677372
				0.313663
				0.161581
				0.584134
				0.52725
				0.52725
				0.156196
				0.677372
				0.724729
				0.677372
				0.677372
				0.677372
				0.966939
				0.677372
				0.150977
				0.660593
				0.0343405
				0.275775
				0.185312
				0.180722
				0.677372
				0.52725
				0.185312
				0.150977
				0.660593
				0.52725
				0.0808829
				0.137516
				0.137516
				0.983704
				0.331266
				0.546395
				0.0894024
				0.584134
				0.660593
				0.677372
				0.677372
				0.677372
				0.62371
				0.677372
				0.185312
				0.584134
				0.00192006
				0.655557
				0.185312
				0.677372
				0.313663
				0.161581
				0.584134
				0.52725
				0.52725
				0.156196
				0.677372
				0.724729
				0.677372
				0.677372
				0.677372
				0.966939
				0.677372
				0.150977
				0.660593
				0.0343405
				0.275775
				0.185312
				0.180722
				0.677372
				0.52725
				0.185312
				0.150977
				0.660593
				0.52725
				0.0808829
				0.137516
				0.137516
				0.983704
				0.331266
				0.546395
				0.0894024
				0.584134
				0.660593
				0.677372
				0.677372
				0.677372
				0.62371
				0.677372
				0.185312
				0.584134
				0.00192006
				0.655557
				0.185312
				0.677372
				0.313663
				0.161581
				0.584134
				0.52725
				0.52725
				0.156196
				0.677372
				0.724729
				0.677372
				0.677372
				0.677372
				0.966939
				0.677372
				0.150977
				0.660593
				0.0343405
				0.275775
				0.185312
				0.180722
				0.677372
				0.52725
				0.185312
				0.150977
				0.660593
				0.52725
				0.0808829
				0.137516
				0.137516
				0.983704
				0.331266
				0.546395
				0.0894024
				0.584134
				0.660593
				0.677372
				0.677372
				0.677372
				0.62371
				0.677372
				0.185312
				0.584134
				0.00192006
				0.655557
				0.185312
				0.677372
				0.313663
				0.161581
				0.584134
				0.52725
				0.52725
				0.156196
				0.677372
				0.724729
				0.677372
				0.677372
				0.677372
				0.966939
				0.677372
				0.150977
				0.660593
				0.0343405
				0.275775
				0.185312
				0.180722
				0.677372
				0.52725
				0.185312
				0.150977
				0.660593
				0.52725
				0.0808829
				0.137516
				0.137516
				0.983704
				0.331266
				0.546395
				0.0894024
				0.584134
				0.660593
				0.677372
				0.677372
				0.677372
				0.62371
				0.677372
				0.185312
				0.584134
				0.00192006
				0.655557
				0.185312
				0.677372
				0.313663
				0.161581
				0.584134
				0.52725
				0.52725
				0.156196
				0.677372
				0.724729
				0.677372
				0.677372
				0.677372
				0.966939
				0.677372
				0.150977
				0.660593
				0.0343405
				0.275775
				0.185312
				0.180722
				0.677372
				0.52725
				0.185312
				0.150977
				0.660593
				0.52725
				0.0808829
				0.137516
				0.137516
				0.983704
				0.331266
				0.546395
				0.0894024
				0.584134
				0.660593
				0.677372
				0.677372
				0.677372
				0.62371
				0.677372
				0.185312
				0.584134
				0.00192006
				0.655557
				0.185312
				0.677372
				0.313663
				0.161581
				0.584134
				0.52725
				0.52725
				0.156196
				0.677372
				0.724729
				0.677372
				0.677372
				0.677372
				0.966939
				0.677372
				0.150977
				0.660593
				0.0343405
				0.275775
				0.185312
				0.180722
				0.677372
				0.52725
				0.185312
				0.150977
				0.660593
				0.52725
				0.0808829
				0.137516
				0.137516
				0.983704
				0.331266
				0.546395
				0.0894024
				0.584134
				0.660593
				0.677372
				0.677372
				0.677372
				0.62371
				0.677372
				0.185312
				0.584134
				0.00192006
				0.655557
				0.185312
				0.677372
				0.313663
				0.161581
				0.584134
				0.52725
				0.52725
				0.156196
				0.677372
				0.724729
				0.677372
				0.677372
				0.677372
				0.966939
				0.677372
				0.150977
				0.660593
				0.0343405
				0.275775
				0.185312
				0.180722
				0.677372
				0.52725
				0.185312
				0.150977
				0.660593
				0.52725
				0.0808829
				0.137516
				0.137516
				0.983704
				0.331266
				0.546395
				0.0894024
				0.584134
				0.660593
				0.677372
				0.677372
				0.677372
				0.62371
				0.677372
				0.185312
				0.584134
				0.00192006
				0.655557
				0.185312
				0.677372
				0.313663
				0.161581
				0.584134
				0.52725
				0.52725
				0.156196
				0.677372
				0.724729
				0.677372
				0.677372
				0.677372
				0.966939
				0.677372
				0.150977
				0.660593
				0.0343405
				0.275775
				0.185312
				0.180722
				0.677372
				0.52725
				0.185312
				0.150977
				0.660593
				0.52725
				0.0808829
				0.137516
				0.137516
				0.983704
				0.331266
				0.546395
				0.0894024
				0.584134
				0.660593
				0.677372
				0.677372
				0.677372
				0.62371
				0.677372
				0.185312
				0.584134
				0.00192006
				0.655557
				0.185312
				0.677372
				0.313663
				0.161581
				0.584134
				0.52725
				0.52725
				0.156196
				0.677372
				0.724729
				0.677372
				0.677372
				0.677372
				0.966939
				0.677372
				0.150977
				0.660593
				0.0343405
				0.275775
				0.185312
				0.180722
				0.677372
				0.52725
				0.185312
				0.150977
				0.660593
				0.52725
				0.0808829
				0.137516
				0.137516
				0.983704
				0.331266
				0.546395
				0.0894024
				0.584134
				0.660593
				0.677372
				0.677372
				0.677372
				0.62371
				0.677372
				0.185312
				0.584134
				0.00192006
				0.655557
				0.185312
				0.677372
				0.313663
				0.161581
				0.584134
				0.52725
				0.52725
				0.156196
				0.677372
				0.724729
				0.677372
				0.677372
				0.677372
				0.966939
				0.677372
				0.150977
				0.660593
				0.0343405
				0.275775
				0.185312
				0.180722
				0.677372
				0.52725
				0.185312
				0.150977
				0.660593
				0.52725
				0.0808829
				0.137516
				0.137516
				0.983704
				0.331266
				0.546395
				0.0894024
				0.584134
				0.660593
				0.677372
				0.677372
				0.677372
				0.62371
				0.677372
				0.185312
				0.584134
				0.00192006
				0.655557
				0.185312
				0.677372
				0.313663
				0.161581
				0.584134
				0.52725
				0.52725
				0.156196
				0.677372
				0.724729
				0.677372
				0.677372
				0.677372
				0.966939
				0.677372
				0.150977
				0.660593
				0.0343405
				0.275775
				0.185312
				0.180722
				0.677372
				0.52725
				0.185312
				0.150977
				0.660593
				0.52725
				0.0808829
				0.137516
				0.137516
				0.983704
				0.331266
				0.546395
				0.0894024
				0.584134
				0.660593
				0.677372
				0.677372
				0.677372
				0.62371
				0.677372
				0.185312
				0.584134
				0.00192006
				0.655557
				0.185312
				0.677372
				0.313663
				0.161581
				0.584134
				0.52725
				0.52725
				0.156196
				0.677372
				0.724729
				0.677372
				0.677372
				0.677372
				0.966939
				0.677372
				0.150977
				0.660593
				0.0343405
				0.275775
				0.185312
				0.180722
				0.677372
				0.52725
				0.185312
				0.150977
				0.660593
				0.52725
				0.0808829
				0.137516
				0.137516
				0.983704
				0.331266
				0.546395
				0.0894024
				0.584134
				0.660593
				0.677372
				0.677372
				0.677372
				0.62371
				0.677372
				0.185312
				0.584134
				0.00192006
				0.655557
				0.185312
				0.677372
				0.313663
				0.161581
				0.584134
				0.52725
				0.52725
				0.156196
				0.677372
				0.724729
				0.677372
				0.677372
				0.677372
				0.966939
				0.677372
				0.150977
				0.660593
				0.0343405
				0.275775
				0.185312
				0.180722
				0.677372
				0.52725
				0.185312
				0.150977
				0.660593
				0.52725
				0.0808829
				0.137516
				0.137516
				0.983704
				0.331266
				0.546395
				0.0894024
				0.584134
				0.660593
				0.677372
				0.677372
				0.677372
				0.62371
				0.677372
				0.185312
				0.584134
				0.00192006
				0.655557
				0.185312
				0.677372
				0.313663
				0.161581
				0.584134
				0.52725
				0.52725
				0.156196
				0.677372
				0.724729
				0.677372
				0.677372
				0.677372
				0.966939
				0.677372
				0.150977
				0.660593
				0.0343405
				0.275775
				0.185312
				0.180722
				0.677372
				0.52725
				0.185312
				0.150977
				0.660593
				0.52725
				0.0808829
				0.137516
				0.137516
				0.983704
				0.331266
				0.546395
				0.0894024
				0.584134
				0.660593
				0.677372
				0.677372
				0.677372
				0.62371
				0.677372
				0.185312
				0.584134
				0.00192006
				0.655557
				0.185312
				0.677372
				0.313663
				0.161581
				0.584134
				0.52725
				0.52725
				0.156196
				0.677372
				0.724729
				0.677372
				0.677372
				0.677372
				0.966939
				0.677372
				0.150977
				0.660593
				0.0343405
				0.275775
				0.185312
				0.180722
				0.677372
				0.52725
				0.185312
				0.150977
				0.660593
				0.52725
				0.0808829
				0.137516
				0.137516
				0.983704
				0.331266
				0.546395
				0.0894024
				0.584134
				0.660593
				0.677372
				0.677372
				0.677372
				0.62371
				0.677372
				0.185312
				0.584134
				0.00192006
				0.655557
				0.185312
				0.677372
				0.313663
				0.161581
				0.584134
				0.52725
				0.52725
				0.156196
				0.677372
				0.724729
				0.677372
				0.677372
				0.677372
				0.966939
				0.677372
				0.150977
				0.660593
				0.0343405
				0.275775
				0.185312
				0.180722
				0.677372
				0.52725
				0.185312
				0.150977
				0.660593
				0.52725
				0.0808829
				0.137516
				0.137516
				0.983704
				0.331266
				0.546395
				0.0894024
				0.584134
				0.660593
				0.677372
				0.677372
				0.677372
				0.62371
				0.677372
				0.185312
				0.584134
				0.00192006
				0.655557
				0.185312
				0.677372
				0.313663
				0.161581
				0.584134
				0.52725
				0.52725
				0.156196
				0.677372
				0.724729
				0.677372
				0.677372
				0.677372
				0.966939
				0.677372
				0.150977
				0.660593
				0.0343405
				0.275775
				0.185312
				0.180722
				0.677372
				0.52725
				0.185312
				0.150977
				0.660593
				0.52725
				0.0808829
				0.137516
				0.137516
				0.983704
				0.331266
				0.546395
				0.0894024
				0.584134
				0.660593
				0.677372
				0.677372
				0.677372
				0.62371
				0.677372
				0.185312
				0.584134
				0.00192006
				0.655557
				0.185312
				0.677372
				0.313663
				0.161581
				0.584134
				0.52725
				0.52725
				0.156196
				0.677372
				0.724729
				0.677372
				0.677372
				0.677372
				0.966939
				0.677372
				0.150977
				0.660593
				0.0343405
				0.275775
				0.185312
				0.180722
				0.677372
				0.52725
				0.185312
				0.150977
				0.660593
				0.52725
				0.0808829
				0.137516
				0.137516
				0.983704
				0.331266
				0.546395
				0.0894024
				0.584134
				0.660593
				0.677372
				0.677372
				0.677372
				0.62371
				0.677372
				0.185312
				0.584134
				0.00192006
				0.655557
				0.185312
				0.677372
				0.313663
				0.161581
				0.584134
				0.52725
				0.52725
				0.156196
				0.677372
				0.724729
				0.677372
				0.677372
				0.677372
				0.966939
				0.677372
				0.150977
				0.660593
				0.0343405
				0.275775
				0.185312
				0.180722
				0.677372
				0.52725
				0.185312
				0.150977
				0.660593
				0.52725
				0.0808829
				0.137516
				0.137516
				0.983704
				0.331266
				0.546395
				0.0894024
				0.584134
				0.660593
				0.677372
				0.677372
				0.677372
				0.62371
				0.677372
				0.185312
				0.584134
				0.00192006
				0.655557
				0.185312
				0.677372
				0.313663
				0.161581
				0.584134
				0.52725
				0.52725
				0.156196
				0.677372
				0.724729
				0.677372
				0.677372
				0.677372
				0.966939
				0.677372
				0.150977
				0.660593
				0.0343405
				0.275775
				0.185312
				0.180722
				0.677372
				0.52725
				0.185312
				0.150977
				0.660593
				0.52725
				0.0808829
				0.137516
				0.137516
				0.983704
				0.331266
				0.546395
				0.0894024
				0.584134
				0.660593
				0.677372
				0.677372
				0.677372
				0.62371
				0.677372
				0.185312
				0.584134
				0.00192006
				0.655557
				0.185312
				0.677372
				0.313663
				0.161581
				0.584134
				0.52725
				0.52725
				0.156196
				0.677372
				0.724729
				0.677372
				0.677372
				0.677372
				0.966939
				0.677372
				0.150977
				0.660593
				0.0343405
				0.275775
				0.185312
				0.180722
				0.677372
				0.52725
				0.185312
				0.150977
				0.660593
				0.52725
				0.0808829
				0.137516
				0.137516
				0.983704
				0.331266
				0.546395
				0.0894024
				0.584134
				0.660593
				0.677372
				0.677372
				0.677372
				0.62371
				0.677372
				0.185312
				0.584134
				0.00192006
				0.655557
				0.185312
				0.677372
				0.313663
				0.161581
				0.584134
				0.52725
				0.52725
				0.156196
				0.677372
				0.724729
				0.677372
				0.677372
				0.677372
				0.966939
				0.677372
				0.150977
				0.660593
				0.0343405
				0.275775
				0.185312
				0.180722
				0.677372
				0.52725
				0.185312
				0.150977
				0.660593
				0.52725
				0.0808829
				0.137516
				0.137516
				0.983704
				0.331266
				0.546395
				0.0894024
				0.584134
				0.660593
				0.677372
				0.677372
				0.677372
				0.62371
				0.677372
				0.185312
				0.584134
				0.00192006
				0.655557
				0.185312
				0.677372
				0.313663
				0.161581
				0.584134
				0.52725
				0.52725
				0.156196
				0.677372
				0.724729
				0.677372
				0.677372
				0.677372
				0.966939
				0.677372
				0.150977
				0.660593
				0.0343405
				0.275775
				0.185312
				0.180722
				0.677372
				0.52725
				0.185312
				0.150977
				0.660593
				0.52725
				0.0808829
				0.137516
				0.137516
				0.983704
				0.331266
				0.546395
				0.0894024
				0.584134
				0.660593
				0.677372
				0.677372
				0.677372
				0.62371
				0.677372
				0.185312
				0.584134
				0.00192006
				0.655557
				0.185312
				0.677372
				0.313663
				0.161581
				0.584134
				0.52725
				0.52725
				0.156196
				0.677372
				0.724729
				0.677372
				0.677372
				0.677372
				0.966939
				0.677372
				0.150977
				0.660593
				0.0343405
				0.275775
				0.185312
				0.180722
				0.677372
				0.52725
				0.185312
				0.150977
				0.660593
				0.52725
				0.0808829
				0.137516
				0.137516
				0.983704
				0.331266
				0.546395
				0.0894024
				0.584134
				0.660593
				0.677372
				0.677372
				0.677372
				0.62371
				0.677372
				0.185312
				0.584134
				0.00192006
				0.655557
				0.185312
				0.677372
				0.313663
				0.161581
				0.584134
				0.52725
				0.52725
				0.156196
				0.677372
				0.724729
				0.677372
				0.677372
				0.677372
				0.966939
				0.677372
				0.150977
				0.660593
				0.0343405
				0.275775
				0.185312
				0.180722
				0.677372
				0.52725
				0.185312
				0.150977
				0.660593
				0.52725
				0.0808829
				0.137516
				0.137516
				0.983704
				0.331266
				0.546395
				0.0894024
				0.584134
				0.660593
				0.677372
				0.677372
				0.677372
				0.62371
				0.677372
				0.185312
				0.584134
				0.00192006
				0.655557
				0.185312
				0.677372
				0.313663
				0.161581
				0.584134
				0.52725
				0.52725
				0.156196
				0.677372
				0.724729
				0.677372
				0.677372
				0.677372
				0.966939
				0.677372
				0.150977
				0.660593
				0.0343405
				0.275775
				0.185312
				0.180722
				0.677372
				0.52725
				0.185312
				0.150977
				0.660593
				0.52725
				0.0808829
				0.137516
				0.137516
				0.983704
				0.331266
				0.546395
				0.0894024
				0.584134
				0.660593
				0.677372
				0.677372
				0.677372
				0.62371
				0.677372
				0.185312
				0.584134
				0.00192006
				0.655557
				0.185312
				0.677372
				0.313663
				0.161581
				0.584134
				0.52725
				0.52725
				0.156196
				0.677372
				0.724729
				0.677372
				0.677372
				0.677372
				0.966939
				0.677372
				0.150977
				0.660593
				0.0343405
				0.275775
				0.185312
				0.180722
				0.677372
				0.52725
				0.185312
				0.150977
				0.660593
				0.52725
				0.0808829
				0.137516
				0.137516
				0.983704
				0.331266
				0.546395
				0.0894024
				0.584134
				0.660593
				0.677372
				0.677372
				0.677372
				0.62371
				0.677372
				0.185312
				0.584134
				0.00192006
				0.655557
				0.185312
				0.677372
				0.313663
				0.161581
				0.584134
				0.52725
				0.52725
				0.156196
				0.677372
				0.724729
				0.677372
				0.677372
				0.677372
				0.966939
				0.677372
				0.150977
				0.660593
				0.0343405
				0.275775
				0.185312
				0.180722
				0.677372
				0.52725
				0.185312
				0.150977
				0.660593
				0.52725
				0.0808829
				0.137516
				0.137516
				0.983704
				0.331266
				0.546395
				0.0894024
				0.584134
				0.660593
				0.677372
				0.677372
				0.677372
				0.62371
				0.677372
				0.185312
				0.584134
				0.00192006
				0.655557
				0.185312
				0.677372
				0.313663
				0.161581
				0.584134
				0.52725
				0.52725
				0.156196
				0.677372
				0.724729
				0.677372
				0.677372
				0.677372
				0.966939
				0.677372
				0.150977
				0.660593
				0.0343405
				0.275775
				0.185312
				0.180722
				0.677372
				0.52725
				0.185312
				0.150977
				0.660593
				0.52725
				0.0808829
				0.137516
				0.137516
				0.983704
				0.331266
				0.546395
				0.0894024
				0.584134
				0.660593
				0.677372
				0.677372
				0.677372
				0.62371
				0.677372
				0.185312
				0.584134
				0.00192006
				0.655557
				0.185312
				0.677372
				0.313663
				0.161581
				0.584134
				0.52725
				0.52725
				0.156196
				0.677372
				0.724729
				0.677372
				0.677372
				0.677372
				0.966939
				0.677372
				0.150977
				0.660593
				0.0343405
				0.275775
				0.185312
				0.180722
				0.677372
				0.52725
				0.185312
				0.150977
				0.660593
				0.52725
				0.0808829
				0.137516
				0.137516
				0.983704
				0.331266
				0.546395
				0.0894024
				0.584134
				0.660593
				0.677372
				0.677372
				0.677372
				0.62371
				0.677372
				0.185312
				0.584134
				0.00192006
				0.655557
				0.185312
				0.677372
				0.313663
				0.161581
				0.584134
				0.52725
				0.52725
				0.156196
				0.677372
				0.724729
				0.677372
				0.677372
				0.677372
				0.966939
				0.677372
				0.150977
				0.660593
				0.0343405
				0.275775
				0.185312
				0.180722
				0.677372
				0.52725
				0.185312
				0.150977
				0.660593
				0.52725
				0.0808829
				0.137516
				0.137516
				0.983704
				0.331266
				0.546395
				0.0894024
				0.584134
				0.660593
				0.677372
				0.677372
				0.677372
				0.62371
				0.677372
				0.185312
				0.584134
				0.00192006
				0.655557
				0.185312
				0.677372
				0.313663
				0.161581
				0.584134
				0.52725
				0.52725
				0.156196
				0.677372
				0.724729
				0.677372
				0.677372
				0.677372
				0.966939
				0.677372
				0.150977
				0.660593
				0.0343405
				0.275775
				0.185312
				0.180722
				0.677372
				0.52725
				0.185312
				0.150977
				0.660593
				0.52725
				0.0808829
				0.137516
				0.137516
				0.983704
				0.331266
				0.546395
				0.0894024
				0.584134
				0.660593
				0.677372
				0.677372
				0.677372
				0.62371
				0.677372
				0.185312
				0.584134
				0.00192006
				0.655557
				0.185312
				0.677372
				0.313663
				0.161581
				0.584134
				0.52725
				0.52725
				0.156196
				0.677372
				0.724729
				0.677372
				0.677372
				0.677372
				0.966939
				0.677372
				0.150977
				0.660593
				0.0343405
				0.275775
				0.185312
				0.180722
				0.677372
				0.52725
				0.185312
				0.150977
				0.660593
				0.52725
				0.0808829
				0.137516
				0.137516
				0.983704
				0.331266
				0.546395
				0.0894024
				0.584134
				0.660593
				0.677372
				0.677372
				0.677372
				0.62371
				0.677372
				0.185312
				0.584134
				0.00192006
				0.655557
				0.185312
				0.677372
				0.313663
				0.161581
				0.584134
				0.52725
				0.52725
				0.156196
				0.677372
				0.724729
				0.677372
				0.677372
				0.677372
				0.966939
				0.677372
				0.150977
				0.660593
				0.0343405
				0.275775
				0.185312
				0.180722
				0.677372
				0.52725
				0.185312
				0.150977
				0.660593
				0.52725
				0.0808829
				0.137516
				0.137516
				0.983704
				0.331266
				0.546395
				0.0894024
				0.584134
				0.660593
				0.677372
				0.677372
				0.677372
				0.62371
				0.677372
				0.185312
				0.584134
				0.00192006
				0.655557
				0.185312
				0.677372
				0.313663
				0.161581
				0.584134
				0.52725
				0.52725
				0.156196
				0.677372
				0.724729
				0.677372
				0.677372
				0.677372
				0.966939
				0.677372
				0.150977
				0.660593
				0.0343405
				0.275775
				0.185312
				0.180722
				0.677372
				0.52725
				0.185312
				0.150977
				0.660593
				0.52725
				0.0808829
				0.137516
				0.137516
				0.983704
				0.331266
				0.546395
				0.0894024
				0.584134
				0.660593
				0.677372
				0.677372
				0.677372
				0.62371
				0.677372
				0.185312
				0.584134
				0.00192006
				0.655557
				0.185312
				0.677372
				0.313663
				0.161581
				0.584134
				0.52725
				0.52725
				0.156196
				0.677372
				0.724729
				0.677372
				0.677372
				0.677372
				0.966939
				0.677372
				0.150977
				0.660593
				0.0343405
				0.275775
				0.185312
				0.180722
				0.677372
				0.52725
				0.185312
				0.150977
				0.660593
				0.52725
				0.0808829
				0.137516
				0.137516
				0.983704
				0.331266
				0.546395
				0.0894024
				0.584134
				0.660593
				0.677372
				0.677372
				0.677372
				0.62371
				0.677372
				0.185312
				0.584134
				0.00192006
				0.655557
				0.185312
				0.677372
				0.313663
				0.161581
				0.584134
				0.52725
				0.52725
				0.156196
				0.677372
				0.724729
				0.677372
				0.677372
				0.677372
				0.966939
				0.677372
				0.150977
				0.660593
				0.0343405
				0.275775
				0.185312
				0.180722
				0.677372
				0.52725
				0.185312
				0.150977
				0.660593
				0.52725
				0.0808829
				0.137516
				0.137516
				0.983704
				0.331266
				0.546395
				0.0894024
				0.584134
				0.660593
				0.677372
				0.677372
				0.677372
				0.62371
				0.677372
				0.185312
				0.584134
				0.00192006
				0.655557
				0.185312
				0.677372
				0.313663
				0.161581
				0.584134
				0.52725
				0.52725
				0.156196
				0.677372
				0.724729
				0.677372
				0.677372
				0.677372
				0.966939
				0.677372
				0.150977
				0.660593
				0.0343405
				0.275775
				0.185312
				0.180722
				0.677372
				0.52725
				0.185312
				0.150977
				0.660593
				0.52725
				0.0808829
				0.137516
				0.137516
				0.983704
				0.331266
				0.546395
				0.0894024
				0.584134
				0.660593
				0.677372
				0.677372
				0.677372
				0.62371
				0.677372
				0.185312
				0.584134
				0.00192006
				0.655557
				0.185312
				0.677372
				0.313663
				0.161581
				0.584134
				0.52725
				0.52725
				0.156196
				0.677372
				0.724729
				0.677372
				0.677372
				0.677372
				0.966939
				0.677372
				0.150977
				0.660593
				0.0343405
				0.275775
				0.185312
				0.180722
				0.677372
				0.52725
				0.185312
				0.150977
				0.660593
				0.52725
				0.0808829
				0.137516
				0.137516
				0.983704
				0.331266
				0.546395
				0.0894024
				0.584134
				0.660593
				0.677372
				0.677372
				0.677372
				0.62371
				0.677372
				0.185312
				0.584134
				0.00192006
				0.655557
				0.185312
				0.677372
				0.313663
				0.161581
				0.584134
				0.52725
				0.52725
				0.156196
				0.677372
				0.724729
				0.677372
				0.677372
				0.677372
				0.966939
				0.677372
				0.150977
				0.660593
				0.0343405
				0.275775
				0.185312
				0.180722
				0.677372
				0.52725
				0.185312
				0.150977
				0.660593
				0.52725
				0.0808829
				0.137516
				0.137516
				0.983704
				0.331266
				0.546395
				0.0894024
				0.584134
				0.660593
				0.677372
				0.677372
				0.677372
				0.62371
				0.677372
				0.185312
				0.584134
				0.00192006
				0.655557
				0.185312
				0.677372
				0.313663
				0.161581
				0.584134
[truncated: 883 more rows]
