# Supplementary material for: Antisense RNAs during early vertebrate development are divided in groups with distinct features
Source: Genome Res. 2021 Jun;31(6):995–1010. doi: 10.1101/gr.262964.120 (PMC8168585; doi:10.1101/gr.262964.120)
Supplement: Supplemental Material [file supp_gr.262964.120_Supplemental_Table_S3.xlsx]

## Sheet: Sheet1
Table S3: Enrichment of histone modifications at promoters using Fisher test from BedTools
Fisher p-value
mRNA	H3K27ac	H3K4me3	H3K27me3
Group-1	3.3985e-15	4.6446e-14	6.4173e-18
Group-2	2.9467e-44	2.5899e-25	4.8601e-13
Group-3	2.2632e-17	7.1016e-12	1.6871e-12
Ratio
mRNAs	H3K27ac	H3K4me3	H3K27me3
Group-1	4.947	5.608	8.134
Group-2	67.553	9.376	6.359
Group-3	5.72	4.94	6.243
Fisher p-value
NATs	H3K27ac	H3K4me3	H3K27me3
Group-1	1.2872e-14	6.696e-08	1.2519e-14
Group-2	7.3642e-28	9.1021e-16	1.3494e-09
Group-3	7.3642e-28	3.6578e-11	9.8165e-13
Ratio
NATs	H3K27ac	H3K4me3	H3K27me3
Group-1	6.644	3.872	7.611
Group-2	39.005	6.679	5.326
Group-3	39.005	4.995	6.683
